# Supplementary material for: Association Between Hip and Depression among Cardiovascular Disease: Insights from NHANES 2013~2023
Source: Research Square preprint supplement (doi:10.21203/rs.3.rs-6472476/v1), 2025-06-09
Supplement: Supplementary file 1 [file ce5784e1bf5c75567bf2b00d.docx]

Table S1 Fitting indicators for the latent class analysis.

| Number | AIC | BIC | aBIC | entropy | LMR_P | BLRT_P | MINOR% |
| --- | --- | --- | --- | --- | --- | --- | --- |
| 1 | 6316.004 | 6340.477 | 6324.597 | 1.000 |  |  |  |
| 2 | 6283.648 | 6337.489 | 6302.553 | 0.682 | <0.001 | <0.001 | 29.69% |
| 3 | **6275.971** | **6359.180** | **6305.188** | **0.805** | **0.008** | **<0.001** | **12.97%** |
| 4 | 6278.384 | 6390.962 | 6317.913 | 0.591 | 0.439 | 0.429 | 9.52% |
| 5 | 6285.945 | 6427.891 | 6335.786 | 0.526 | 0.335 | 0.999 | 3.28% |

Note: AIC, Akaike Information Criterion; BIC, Bayesian Information Criterion; aBIC, Adjusted Bayesian Information Criterion; BLRT, Bootstrap Likelihood Ratio Test; aLMR, Adjusted Lo-Mendell-Rubin Likelihood Ratio Test. MINOR% is the Minimum Number of Categories percentage (%).

Table S2 Association between BMI, WC, hip and depression among CVD.

| Variables | Crude model | | Adjusted model | |
| --- | --- | --- | --- | --- |
| OR (95%CI) | *p* value | OR (95%CI) | *p* value |
| BMI | **1.034 (1.004,1.065)** | **0.025*** | 0.916 (0.825,1.016) | 0.097 |
| WC | **1.015 (1.001,1.030)** | **0.036*** | 1.012 (0.979,1.045) | 0.482 |
| Hip | **1.021 (1.007,1.035)** | **0.004*** | **1.053 (1.009,1.099)** | **0.018*** |

Notes: Models adjusted for age, sex, race, educational level and PIR.

CI, confidence interval; PIR, poverty income ratio; BMI, body mass index; WC, waist circumference; CVD, cardiovascular disease; PHQ-9, Patient Health Questionnaire-9.

*Significant correlation, P<0.05.

Table S3 Correlation matrix between variables among CVD.

| Variables | 1 | 2 | 3 | 4 | 5 | 6 | 7 | 8 | 9 | 10 | 11 |
| --- | --- | --- | --- | --- | --- | --- | --- | --- | --- | --- | --- |
| 1. Age | − |  |  |  |  |  |  |  |  |  |  |
| 2. Sex | −0.126** | − |  |  |  |  |  |  |  |  |  |
| 3. Race | −0.227** | 0.002 | − |  |  |  |  |  |  |  |  |
| 4. Education level | 0.068* | −0.077* | −0.138** | − |  |  |  |  |  |  |  |
| 5. PIR | 0.198** | −0.116** | −0.164** | 0.382** | − |  |  |  |  |  |  |
| 6. BMI | −0.138** | 0.055 | −0.001 | −0.050 | 0.007 | − |  |  |  |  |  |
| 7. WC | −0.069* | −0.095** | −0.082** | −0.022 | 0.022 | 0.770** | − |  |  |  |  |
| 8. Hip | −0.171** | 0.241** | −0.092* | −0.015 | −0.016 | 0.686** | 0.843** | − |  |  |  |
| 9. Lifestyle patterns | 0.178** | −0.010 | −0.192** | 0.103** | 0.130** | 0.059 | 0.090** | 0.108** | − |  |  |
| 10. Depression | −0.143** | 0.136** | −0.024 | −0.142** | −0.167** | 0.060 | 0.072* | 0.123** | −0.076* | − |  |
| 11. PHQ-9 | −0.167** | 0.166** | 0.066* | −0.164** | −0.200** | 0.122** | 0.119** | 0.196** | −0.084** | 0.821** | − |

Notes: *Significant correlation, P<0.05; **, P<0.01.

PIR, poverty income ratio; BMI, body mass index; WC, waist circumference; CVD, cardiovascular disease; PHQ-9, Patient Health Questionnaire-9.

Table S4 The direct and indirect effects of lifestyle patterns on PHQ-9 among CVD.

| Variables | β | Boot SE | Boot CI | |
| --- | --- | --- | --- | --- |
| Lower Limit | Upper Limit |
| **Hip** |  |  |  |  |
| Class 1 |  |  |  |  |
| Direct effect | **1.225*** | 0.507 | 0.230 | 2.220 |
| Indirect effect | −0.130 | 0.106 | −0.349 | 0.004 |
| Class 2 |  |  |  |  |
| Direct effect | −0.986 | 0.590 | −2.145 | 0.173 |
| Indirect effect | **−0.366*** | 0.149 | −0.695 | −0.120 |

Notes: *: P<0.05; a: Reference group: Class 3; Boot SE, bootstrap standard error; CI, Confidence Interval; Boot CI, bootstrap CI.

All models were adjusted for age, sex, race, education level, BMI and PIR.
